# Supplementary material for: Proportional Tumor Infiltration of T Cells via Circulation Duplicates the T Cell Receptor Repertoire in a Bilateral Tumor Mouse Model
Source: PubMed Central journal article supplement (PMC8573377; doi:10.3389/fimmu.2021.744381), 2021-10-25

# Supplementary Figure 1.

## Tumor

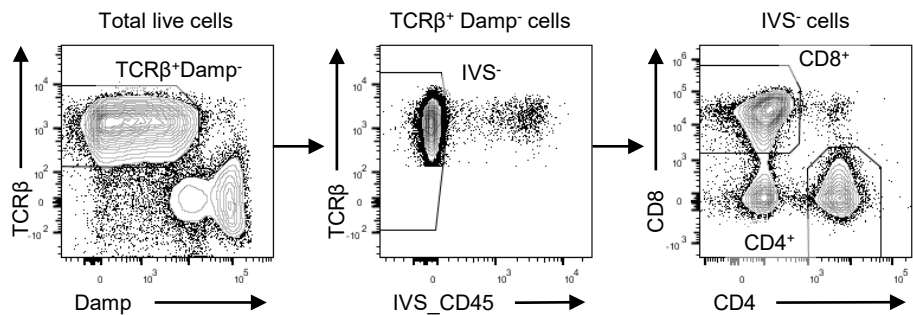

## dLN

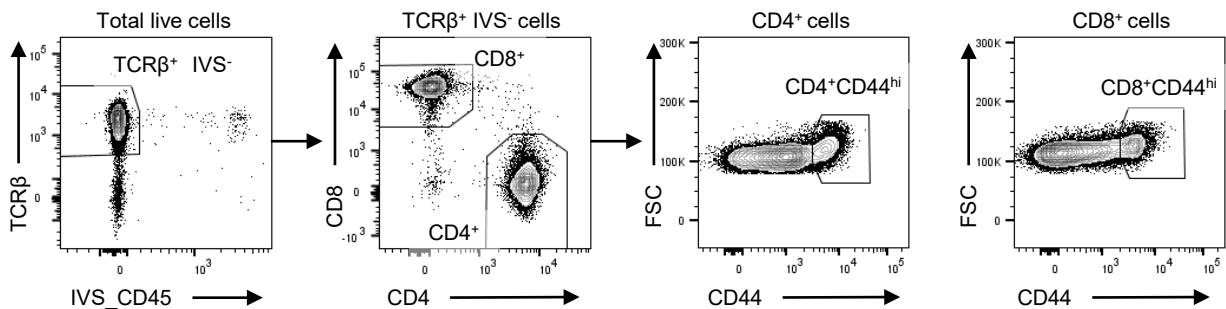

Supplementary Figure 2.

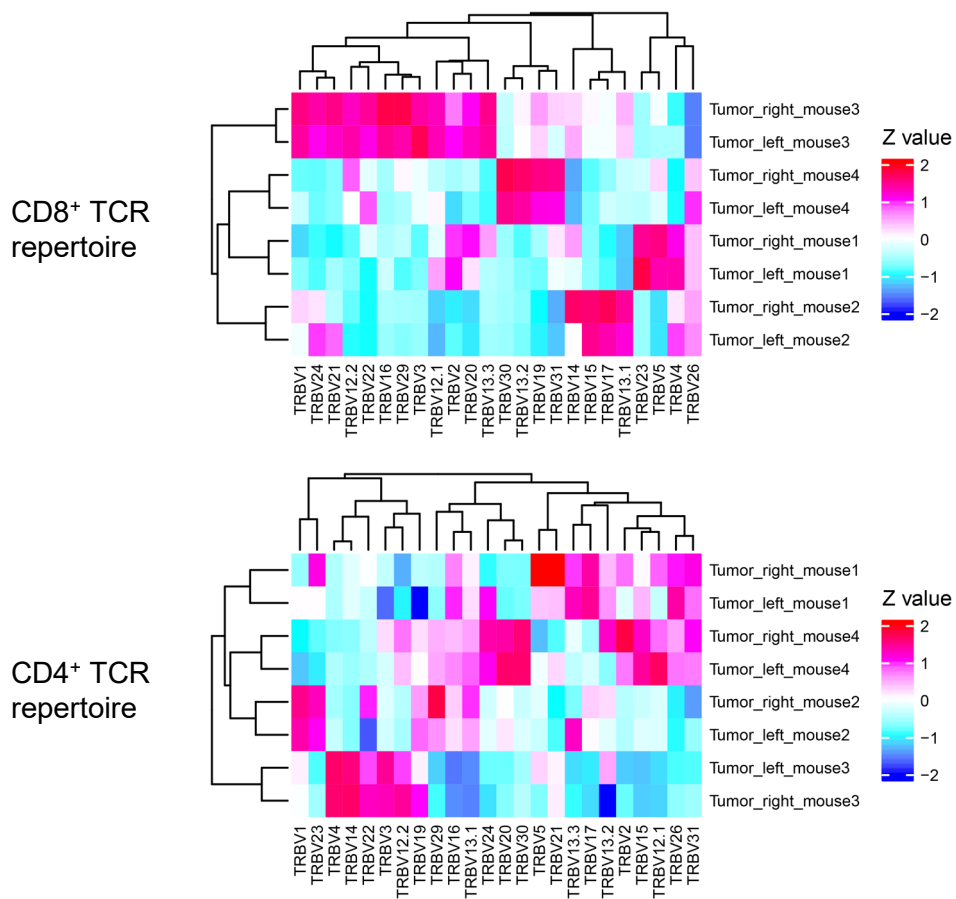

Supplementary Figure 3.

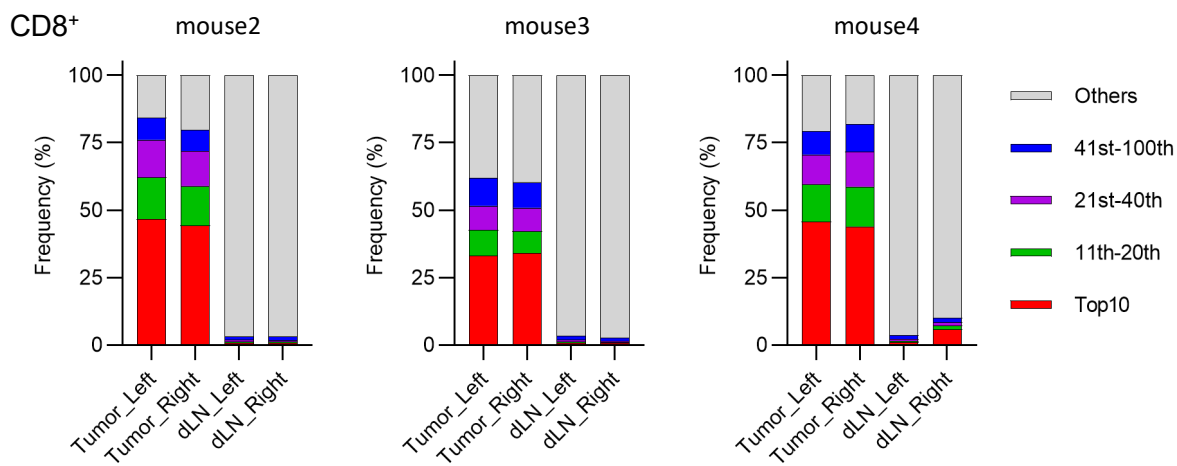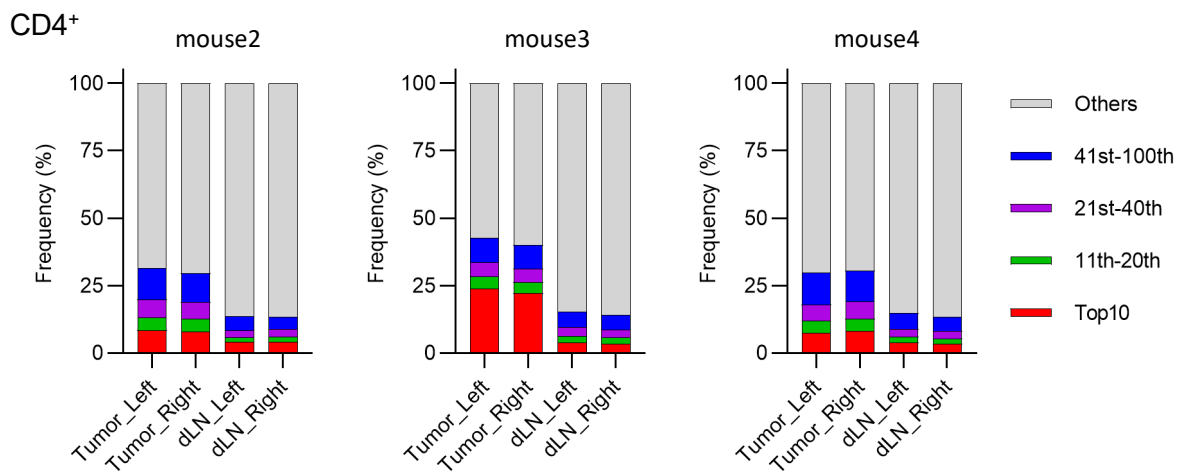

Supplementary Figure 4.

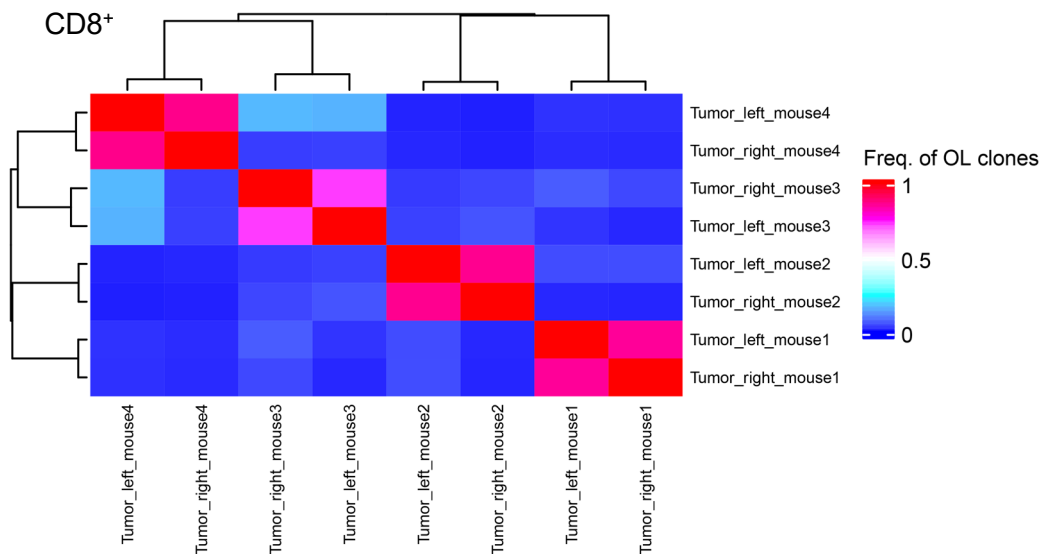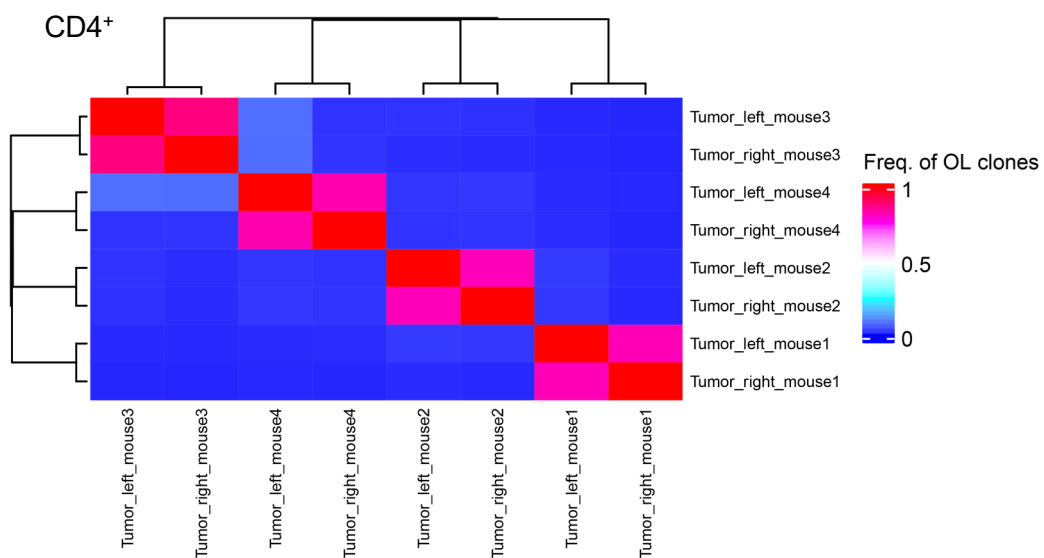

Supplementary Figure 5.

**A** CD8<sup>+</sup>

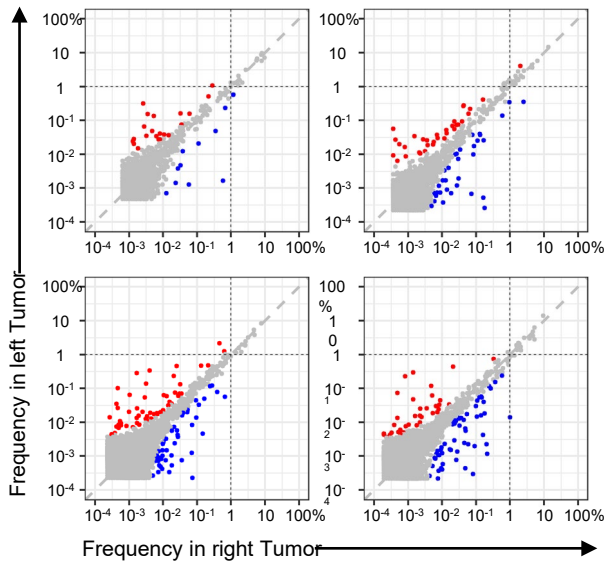

**CD4<sup>+</sup>**

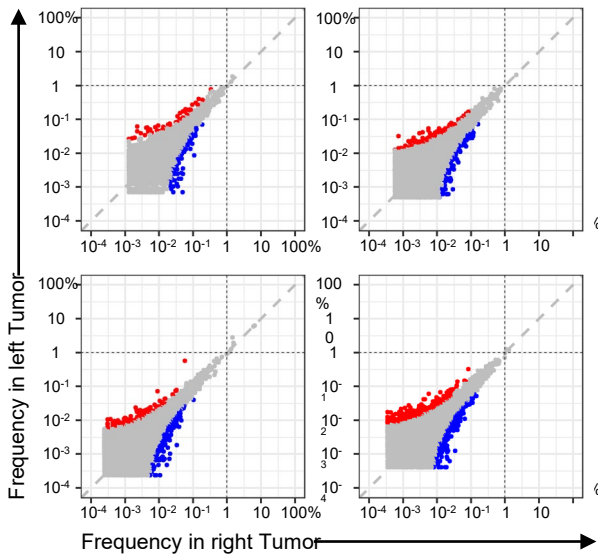

**B**

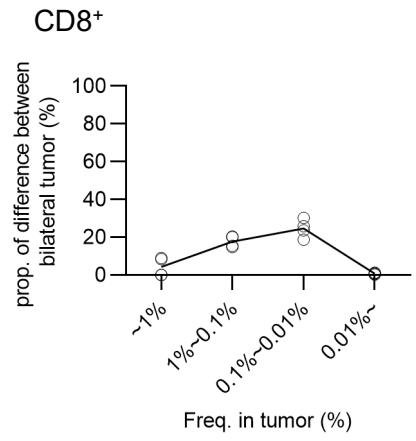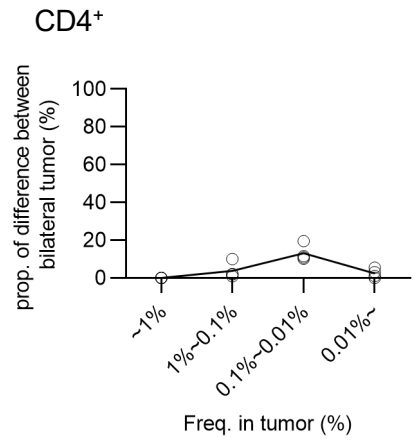

Supplementary Figure 6.

CD8<sup>+</sup>

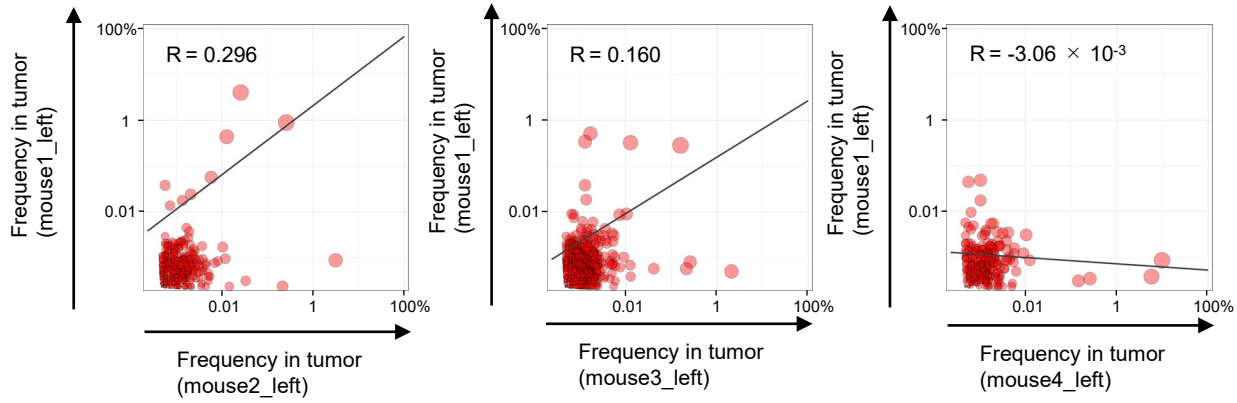

CD4<sup>+</sup>

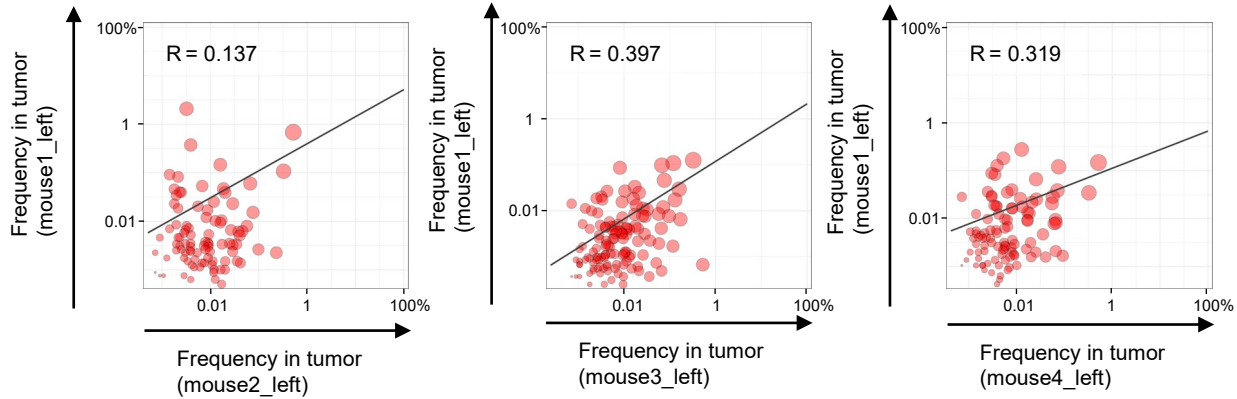

Supplementary Figure 7.

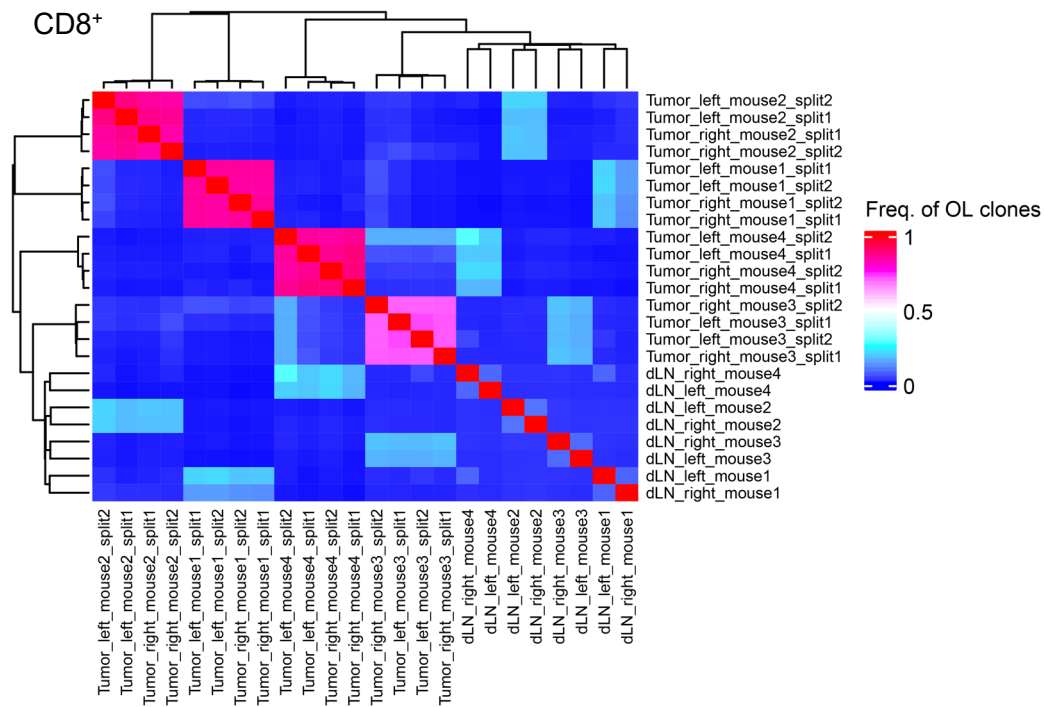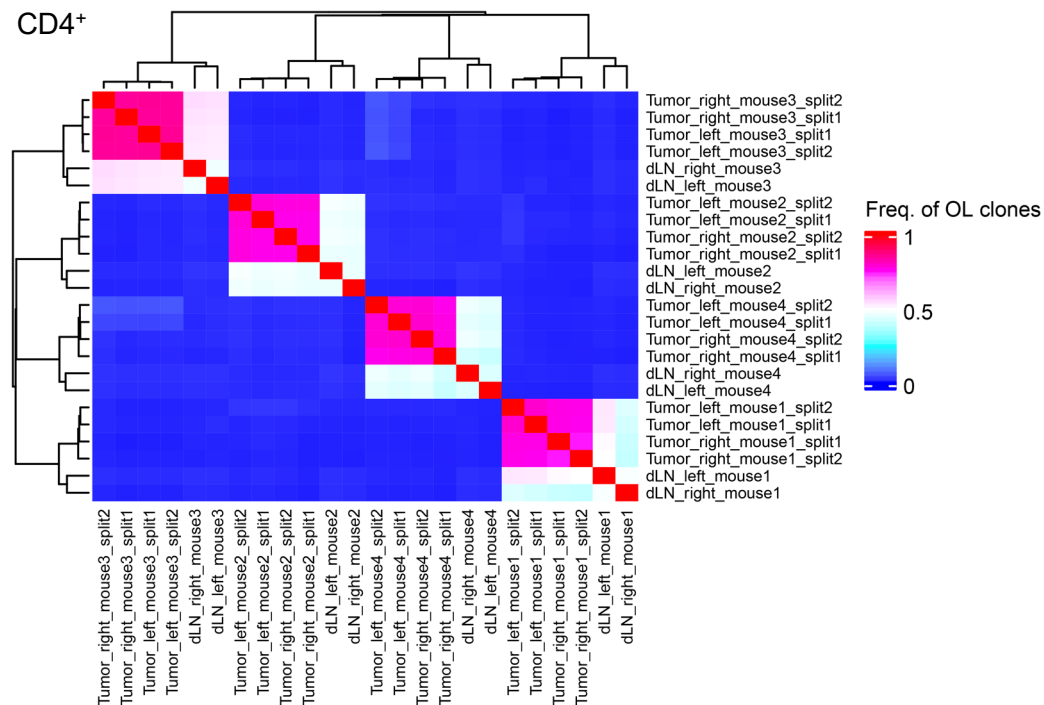

Supplementary Figure 8.

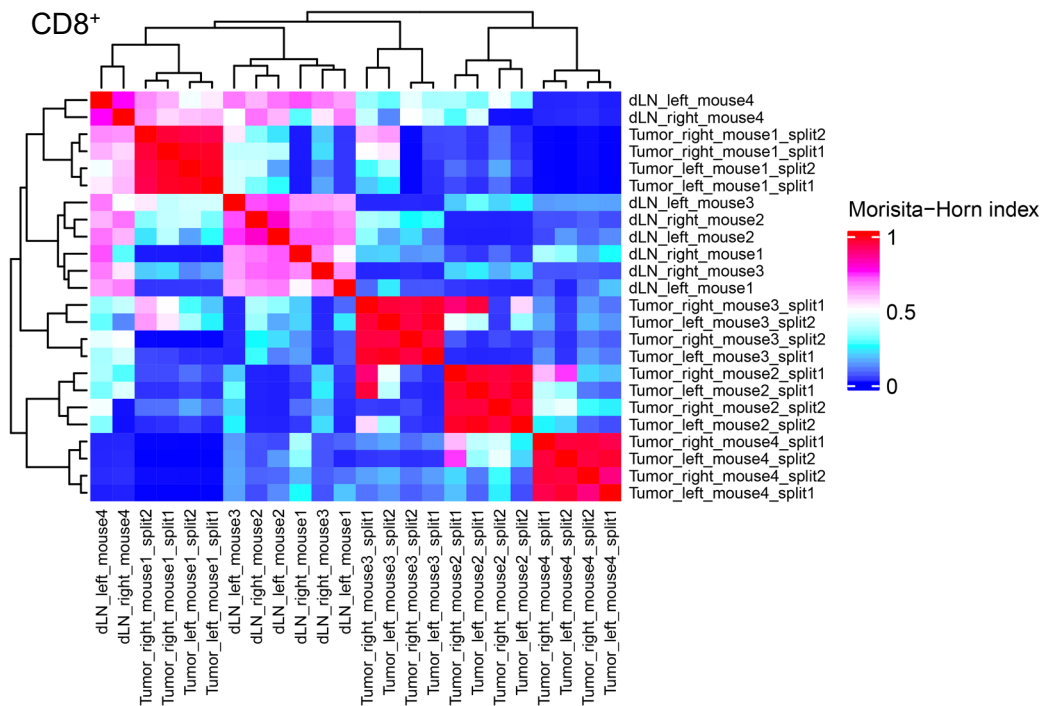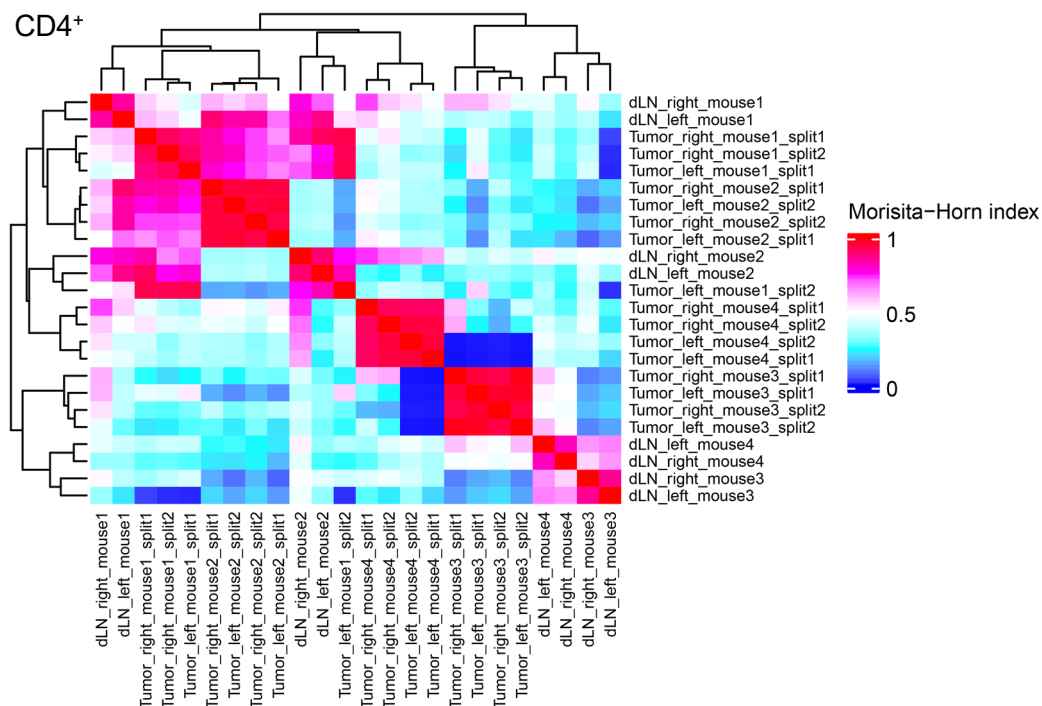

Supplement: DataSheet_1.pdf [file DataSheet_1.pdf]
